# Supplementary material for: On-target, dual aminopeptidase inhibition provides cross-species antimalarial activity
Source: PubMed Central journal article supplement (PMC11237774; doi:10.1128/mbio.00966-24), 2024-05-08
Supplement: mbio.00966-24-s0001.pdf [file mbio.00966-24-s0001.pdf]

# **On-target, dual aminopeptidase inhibition provides cross-species antimalarial activity**

Rebecca C.S. Edgar<sup>1,2</sup>, Tess R. Malcolm<sup>3</sup>, Ghizal Siddiqui<sup>4</sup>, Carlo Giannangelo<sup>4</sup>, Natalie A. Counihan<sup>1,2</sup>, Matthew Challis<sup>4</sup>, Sandra Duffy<sup>5</sup>, Mrittika Chowdhury<sup>1,2</sup>, Jutta Marfurt<sup>6</sup>, Madeline Dans<sup>1,2</sup>, Grennady Wirjanata<sup>6</sup>, Rintis Noviyanti<sup>7</sup>, Kajal Daware<sup>3</sup>, Chathura D. Suraweera<sup>3</sup>, Ric N Price<sup>6,8,9</sup>, Sergio Wittlin<sup>10,11</sup>, Vicky M. Avery<sup>12</sup>, Nyssa Drinkwater<sup>3</sup>, Susan A. Charman<sup>13</sup>, Darren J. Creek<sup>4</sup>, Tania F. de Koning-Ward<sup>1,2#</sup>, Peter J. Scammells<sup>14#</sup> & Sheena McGowan<sup>3#</sup>

## **SUPPLEMENTARY DATA**

**Supplementary Table 1: Data collection and refinement statistics for X-ray crystal structures**

|                                 | <i>PfA-M1 - MMV1557817</i>      | <i>PfA-M17 - MMV1557817</i>      | <i>PfA-M17(A460S)</i>            |
|---------------------------------|---------------------------------|----------------------------------|----------------------------------|
| PDB ID                          | 8SVL                            | 8SVM                             | 8SW9                             |
| <i>Data Collection</i>          |                                 |                                  |                                  |
| Wavelength                      | 0.95370                         | 0.95370                          | 0.95370                          |
| Resolution range                | 41.29 - 1.504 (1.56 - 1.50)     | 46.5 - 2.3 (2.382 - 2.3)         | 49.57 - 2.6 (2.69 - 2.60)        |
| Space group                     | P 21 21 21                      | P 21 21 21                       | P 21 21 21                       |
| Unit cell (a, b, c,<br>α, β, γ) | 74.90 109.01 118.03<br>90 90 90 | 174.20 177.93 229.76<br>90 90 90 | 174.34 176.73 225.21<br>90 90 90 |
| Total reflections               | 1055651 (47886)                 |                                  | 425739 (42117)                   |
| Unique reflections              | 153386 (15196)                  | 306753 (30690)                   | 212977 (21059)                   |
| Multiplicity                    | 6.9 (6.4)                       | 3.0 (2.9)                        | 2.0 (2.0)                        |
| Completeness (%)                | 99.97 (99.97)                   | 96.59 (94.09)                    | 99.70 (99.91)                    |
| Mean I/sigma(I)                 | 11.5 (1.1)                      | 3.0 (1.5)                        | 3.88 (1.17)                      |
| Wilson B-factor                 | 16.10                           | 24.57                            | 34.69                            |
| R-pim (all I+ & I-)             | 0.042 (0.685)                   | 0.223 (1.483)                    | 0.1162 (0.6269)                  |
| CC1/2                           | 0.999 (0.431)                   | 0.931 (0.150)                    | 0.989 (0.641)                    |
| <i>Refinement statistics</i>    |                                 |                                  |                                  |
| Reflections used in refinement  | 153367 (15192)                  | 303998 (29370)                   | 212390 (21040)                   |
| Reflections used for R-free     | 7575 (705)                      | 15065 (1432)                     | 10830 (1062)                     |
| R-work                          | 0.1566 (0.2736)                 | 0.2068 (0.3059)                  | 0.2348 (0.3156)                  |
| R-free                          | 0.1886 (0.2933)                 | 0.2529 (0.3713)                  | 0.2804 (0.3584)                  |
| Number of non-hydrogen atoms    | 8676                            | 50865                            | 48047                            |
| macromolecules                  | 7310                            | 47076                            | 46600                            |
| ligands                         | 82                              | 756                              | 383                              |
| solvent                         | 1284                            | 3033                             | 1064                             |
| Protein residues                | 889                             | 6177                             | 6150                             |
| RMS (bonds)                     | 0.019                           | 0.004                            | 0.002                            |
| RMS (angles)                    | 1.69                            | 0.72                             | 0.59                             |
| Ramachandran favored (%)        | 98.20                           | 96.77                            | 96.52                            |
| Ramachandran allowed (%)        | 1.69                            | 3.13                             | 3.08                             |
| Ramachandran outliers (%)       | 0.11                            | 0.10                             | 0.39                             |
| Rotamer outliers (%)            | 0.37                            | 0.90                             | 2.82                             |
| Clashscore                      | 3.69                            | 3.53                             | 6.22                             |
| Average B-factor                | 22.77                           | 27.02                            | 39.66                            |
| macromolecules                  | 20.27                           | 26.39                            | 39.65                            |
| ligands                         | 31.19                           | 43.59                            | 50.38                            |
| solvent                         | 36.44                           | 32.54                            | 36.02                            |

Statistics for the highest-resolution shell are shown in parentheses.

**Supplementary Table 2: Activity of MMV1557817 against *P. falciparum* gametocytes (IC<sub>50</sub> values (nM); mean ± SD)**

| Compound          | Early-stage Gametocytes | Late-stage Gametocytes | Mature-stage Gametocytes |
|-------------------|-------------------------|------------------------|--------------------------|
| <b>MMV1557817</b> | <b>99 ± 2.0</b>         | <b>309 ± 1.0</b>       | <b>1474 ± 304</b>        |
| artesunate        | 16 ± 5.0                | 26 ± 2.0               | 51 ± 23                  |
| pyrimethamine     | N/A at 40µM             | N/A at 40µM            | N/A at 40µM              |
| chloroquine       | 157 ± 3.5               | 99% at 40µM            | 94% at 40µM              |
| pyronaridine      | 67 ± 7.0                | 2280 ± 679             | 1254 ± 120               |
| puromycin         | 163 ± 18                | 94 ± 5.0               | 73 ± 24                  |
| DHA               | 16 ± 2.0                | 35 ± 12                | 103 ± 30                 |
| Methylene Blue    | 110 ± 4.0               | 52 ± 2.0               | 63 ± 26                  |

**Supplementary Table 3: Interaction between artemisinin and MMV1557817 against *P. falciparum* Dd2 parasites**

| Ratio (MMV1557817: artemisinin) | MMV1557817 mean FIC ± SEM | artemisinin mean FIC ± SEM | Σ FICs (interaction) |
|---------------------------------|---------------------------|----------------------------|----------------------|
| <b>0:5</b>                      | 0                         | 1.00 ± 0.12                |                      |
| <b>1:4</b>                      | 0.87 ± 0.08               | 0.75 ± 0.07                | 1.62 (Additive)      |
| <b>2:3</b>                      | 1.13 ± 0.19               | 0.37 ± 0.06                | 1.49 (Additive)      |
| <b>3:2</b>                      | 1.10 ± 0.20               | 0.16 ± 0.03                | 1.26 (Additive)      |
| <b>4:1</b>                      | 1.05 ± 0.18               | 0.06 ± 0.01                | 1.11 (Additive)      |
| <b>5:0</b>                      | 1.00 ± 0.19               | 0                          |                      |

FIC: fractional inhibitory concentration

**Supplementary Table 4: Baseline characteristics of isolates for which *ex vivo* assay was accomplished.**

| Baseline characteristics                                                   | <i>P. falciparum</i><br>n=15 | <i>P. vivax</i><br>n=8 |
|----------------------------------------------------------------------------|------------------------------|------------------------|
| Total number of isolates reaching harvest (%)                              | 14 (93)                      | 6 (75)                 |
| Median (range) duration of assay (hours)                                   | 44 (41-46)                   | 47 (44-48)             |
| Geometric mean (95% CI <sup>a</sup> ), parasitaemia (asexual parasites/µL) | 31,779 (14,914-67,713)       | 9,837 (3,124 – 30,975) |
| Median initial % (range) of parasites at ring stage                        | 100 <sup>b</sup>             | 90 (76-99)             |
| Mean (95% CI) schizont count at harvest                                    | 50(34-86)                    | 45 (28-55)             |

<sup>a</sup> CI, confidence interval

<sup>b</sup> No range given (all values were 100%)

**Supplementary Table 5. Ex vivo drug susceptibility to MMV1557818 and standard anti-malarials according to species tested.**

| Drug              | <i>P. falciparum</i> median EC <sub>50</sub> (range), nM (n = 15) | <i>P. vivax</i> median EC <sub>50</sub> (range), nM (n = 6) |
|-------------------|-------------------------------------------------------------------|-------------------------------------------------------------|
| <b>MMV1557817</b> | 98.1 (30.4 – 201.1)                                               | 68.6 (57.2 – 150.9)                                         |
| chloroquine       | 64.8 (38.3 – 283.2)                                               | 36.4 (11.6 – 114.0)                                         |
| piperaquine       | 60.8 (17.6 – 130.0)                                               | 46.6 (15.0 – 134.8)                                         |
| mefloquine        | 10.0 (4.9 – 41.9)                                                 | 11.2 (8.1 – 20.7)                                           |
| artesunate        | 1.2 (0.4 – 4.3)                                                   | 0.6 (0.3 – 2.4)                                             |

**Supplementary Table 6: Inhibition of aminopeptidase activity with increasing concentrations of MMV1557817 or artesunate.**

| [Compound] (μM)   | <i>Pf</i> -M1 | <i>Pv</i> -M1 | <i>Pb</i> -M1 | LTA4H  | ERAP1 | ERAP2  |
|-------------------|---------------|---------------|---------------|--------|-------|--------|
| <b>MMV1557817</b> |               |               |               |        |       |        |
| 1.25              | 83 %          | 96 %          | 94 %          | 18 %   | 0 %   | 7 %    |
| 10                | 100 %         | 100 %         | 100 %         | 16 %   | 0 %   | 0 %    |
| 500               | -             | -             | -             | 71 %   | 75 %  | 99.1 % |
| 1000              | -             | -             | -             | 87 %   | 98 %  | 100 %  |
| <b>Artesunate</b> |               |               |               |        |       |        |
| 1.25              | 4.8 %         | 2.1 %         | 0 %           | 0 %    | 0 %   | 0 %    |
| 10                | 11.9 %        | 23.6 %        | 12.8 %        | 12.8 % | 0 %   | 0 %    |
| 500               | 16.8 %        | 74.0 %        | 81.3 %        | 20.2 % | 0 %   | 0 %    |
| 1000              | 43.2 %        | 68.2 %        | 78.2 %        | 36 %   | 0 %   | 0 %    |

**Supplementary Table 7: Percent inhibition of control enzyme activity.**

| Protein      | Mean % inhibition by MMV1557817 (n=2) |
|--------------|---------------------------------------|
| HDAC1        | 2.8                                   |
| HDAC2        | 3.0                                   |
| HDAC5        | -2.8                                  |
| HDAC7        | 7.7                                   |
| HDAC8        | 6.3                                   |
| HDAC9        | -3.6                                  |
| HDAC10       | 5.3                                   |
| MMP-2        | 39.8                                  |
| MMP-3        | -0.8                                  |
| MMP-7        | -6.7                                  |
| <b>MMP-8</b> | <b>52.6</b>                           |
| MMP-9        | 46.3                                  |
| MMP-14       | 24.1                                  |

**Supplementary Table 8: Physicochemical and *in vitro* stability properties of MMV1557817**

| <b>Parameter</b>                                                                   | <b>MMV1557817</b>  |
|------------------------------------------------------------------------------------|--------------------|
| MW                                                                                 | 394.39             |
| calc Log D <sub>7.4</sub>                                                          | 3.6                |
| Kinetic Solubility (µg/mL) pH 2.0 / 6.5                                            | 12.5-25 / 12.5-25  |
| <i>in vitro</i> microsomal CL <sub>int</sub> (µL/min/mg) H / R / M*                | 11 / 29 / 23       |
| <i>in vitro</i> hepatocyte CL <sub>int</sub> (µL/min/10 <sup>6</sup> cells) H / R* | 2 / 4              |
| Plasma stability (% remaining, 4 h, 37°C) H / M*                                   | 97 / 93            |
| Plasma protein binding (%) H / R / M*                                              | 98.8 / 97.8 / 97.7 |
| Albumax media binding (%)                                                          | 84.5               |

\*H: human, R: rat, M: mouse

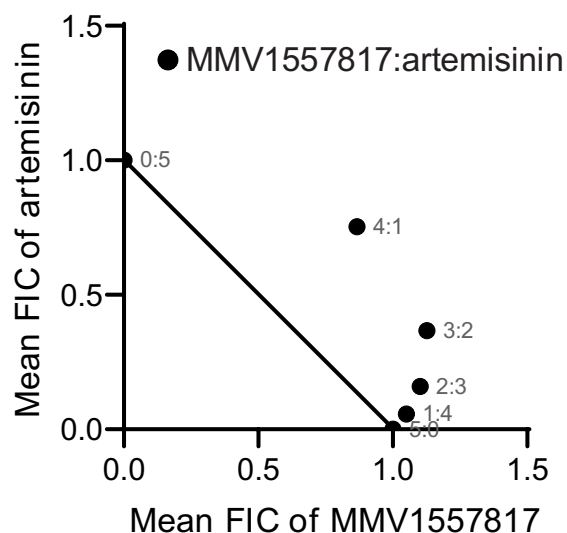

**Supplementary Figure 1.** Isobologram showing the interaction between **MMV1557817** and artemisinin tested in Dd2 parasites. Fractional inhibitory concentration (FIC)  $\leq 2 \geq 1$  indicate additive effects of the individual compounds. n = 3 performed in triplicate.

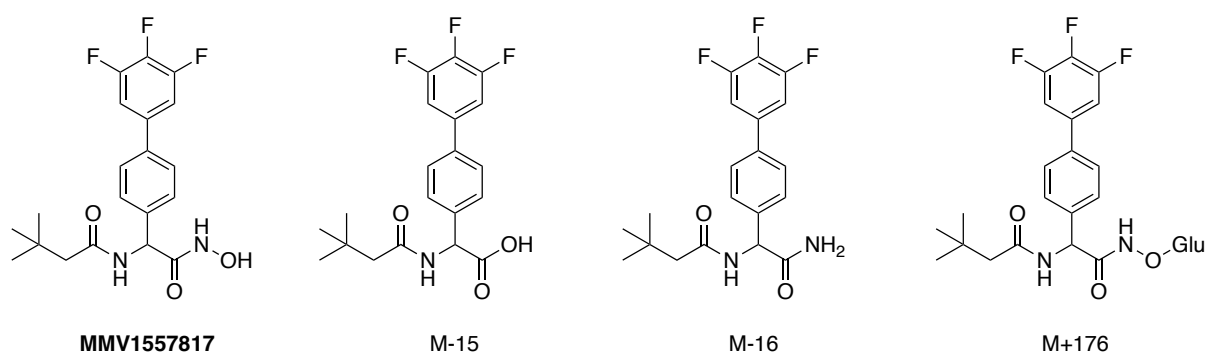

**Supplementary Figure 2.** **MMV1557817** and putative metabolites detected following incubation with human and rat cryopreserved hepatocytes.

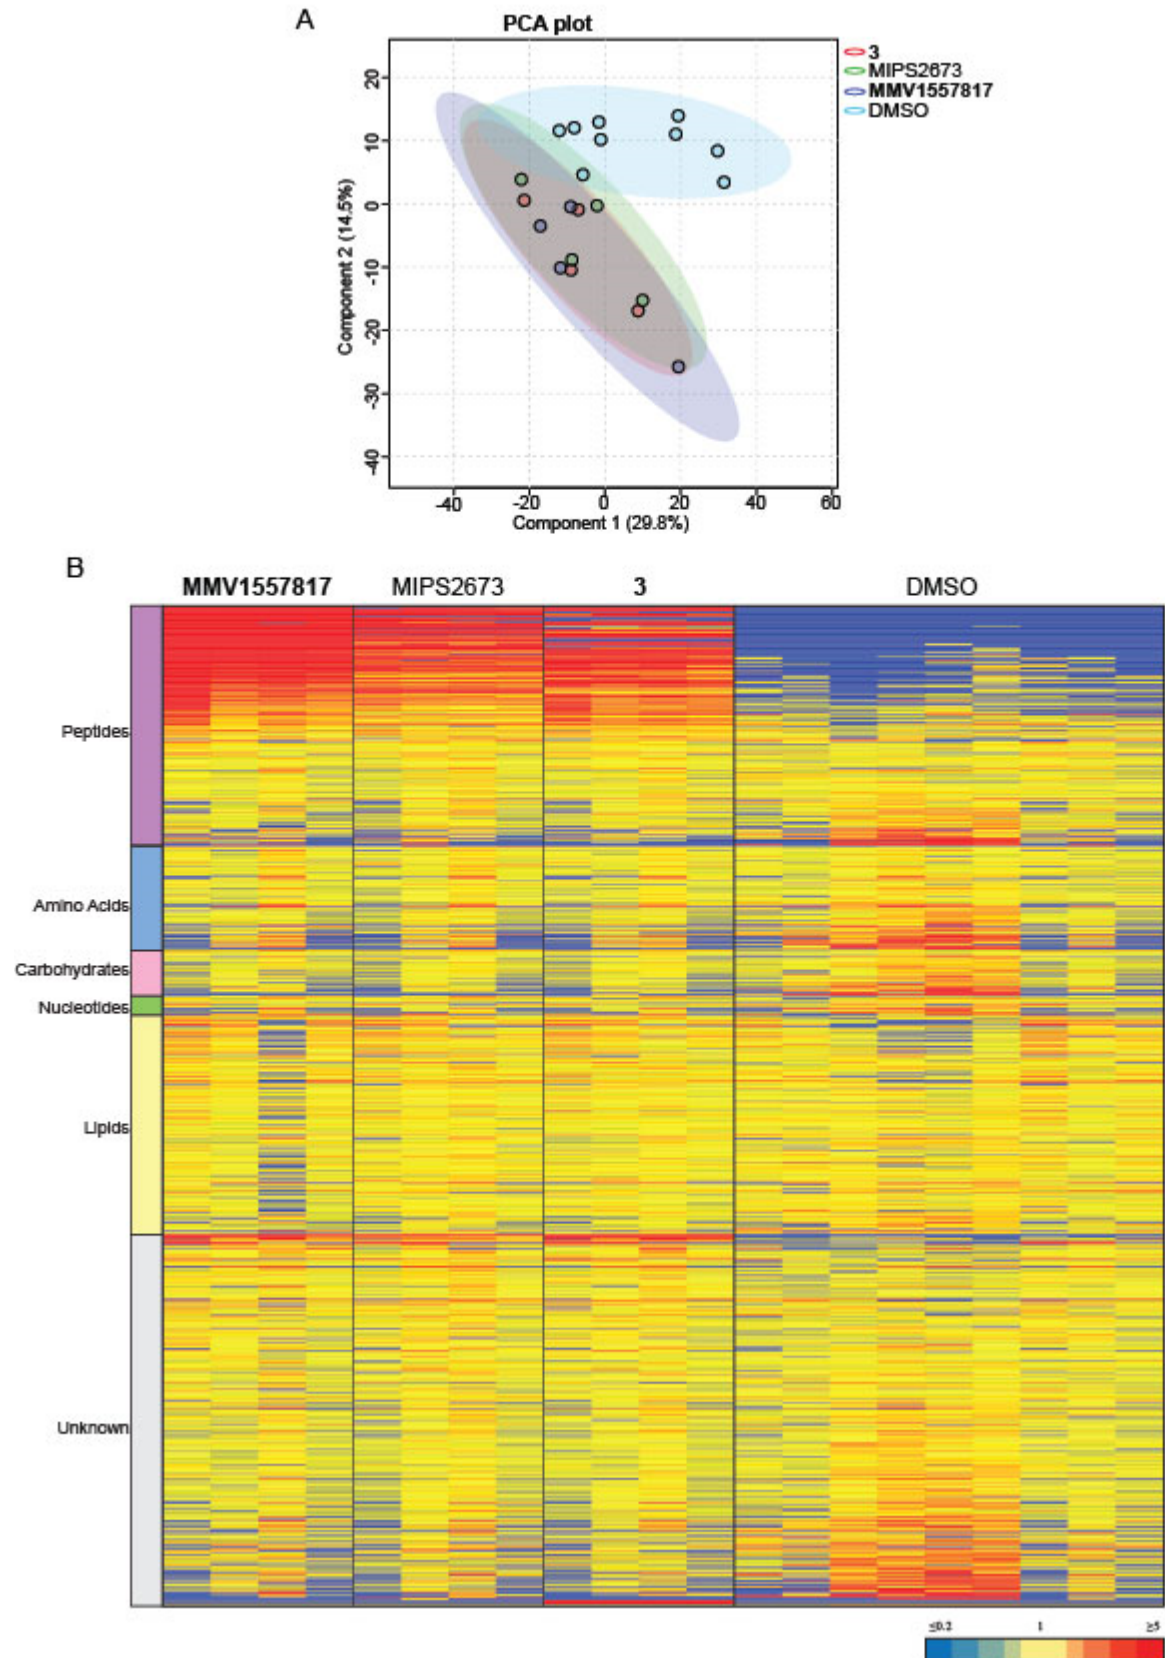

**Supplementary Figure 3.** Untargeted metabolomics analysis of *Pf3D7* parasites treated with **MMV1557817**, MIPS2673 (*PfA-M1* inhibitor), **3** (*PfA-M17* inhibitor), and DMSO control. (A) Principal component analysis (PCA) of parasites treated with

MIPS1557817, MIPS2673 (*PfA-M1* inhibitor (53)), **3** (*PfA-M17* inhibitor (7)), and DMSO control. Scores plot shows principal components one and two, data points indicate individual sample replicates within each condition and the shaded area denotes 95% confidence interval. (B) Heatmap analysis of peak intensities of all putative metabolites for each condition. Data is shown from 4-7 biological replicates, red, blue and yellow indicates increase, decrease and no change in the relative abundance of putative metabolites identified, respectively. Data for **3** and MIPS2673 has been previously published (7, 53).

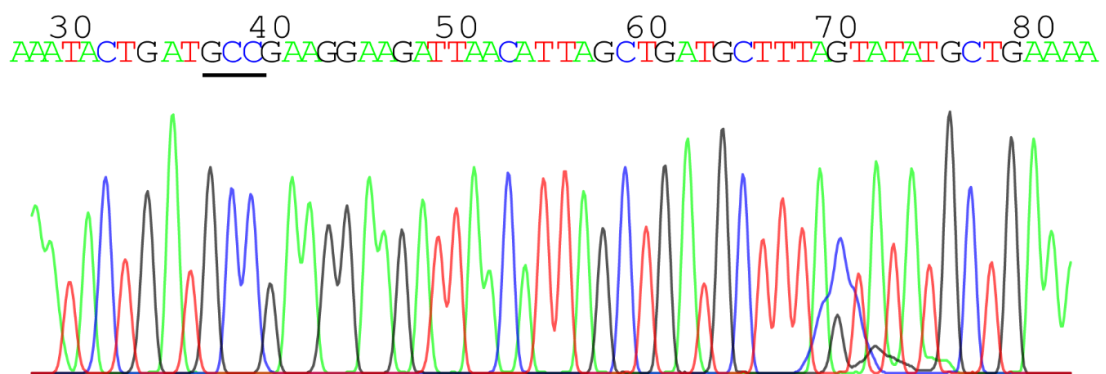

**Supplementary Figure 4.** Chromatogram of Sanger sequencing of DNA extracted from parasites harbouring a silent mutation (gct to gcc; underlined in black) at A460 in *Pfa-m17* introduced using CRISPR-Cas9.



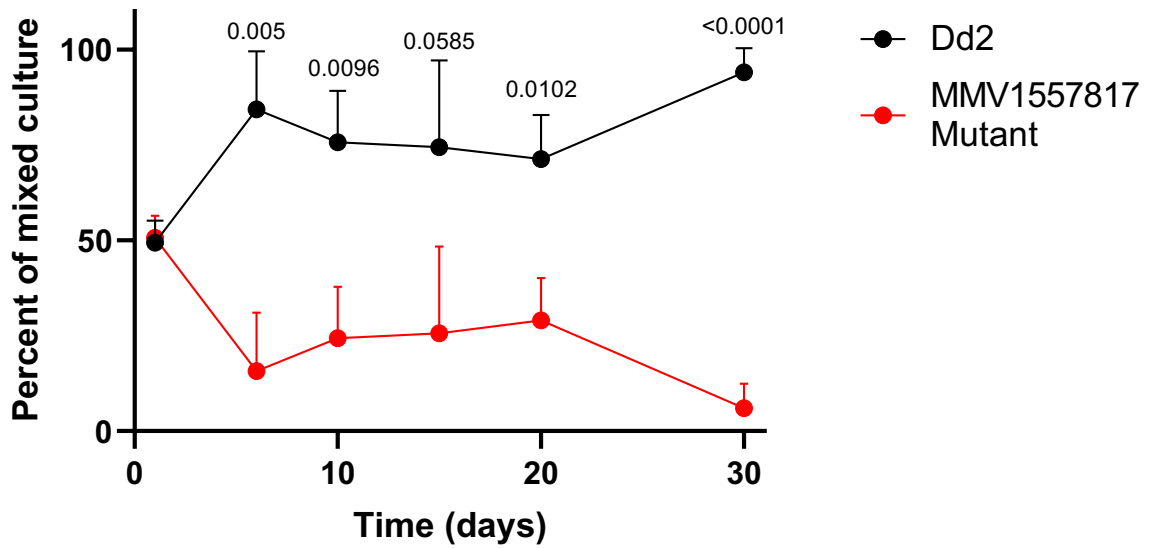

**Supplementary Figure 5.** Growth competition analysis of **MMV1557817** resistance parasites versus Dd2 as identified through SNP identification by Sanger Sequencing of the A460 locus of *Pfa-m17*. Statistical significance indicated above and determined for each timepoint using an unpaired t-test, n = 3.

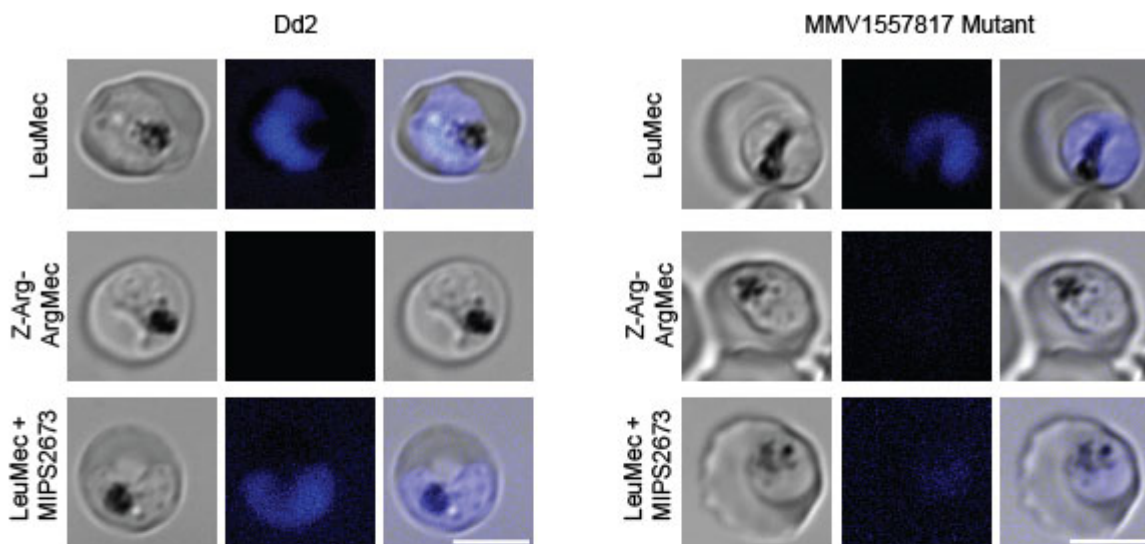

**Supplementary Figure 6.** Representative images of live cell Dd2 and **MMV1557817** resistant parasites after treatment with the indicated fluorescent substrates. The bottom panel has additionally been treated with the *PfA-M1* specific inhibitor MIPS2673 at 10x EC<sub>50</sub> (3.2 μM; (53)). Scale bar 5 μM.
